# Supplementary material for: The Homeotic Protein SIX3 Suppresses Carcinogenesis and Metastasis through Recruiting the LSD1/NuRD(MTA3) Complex
Source: PubMed Central journal article supplement — Theranostics. 2018 Jan 1;8(4):972–89. doi: 10.7150/thno.22328 (PMC5817105; doi:10.7150/thno.22328), 2018-01-01
Supplement: thnov08p0972s1.pdf [file thnov08p0972s1.pdf]

### Supplementary Table S1: Mass Spectrometry Analysis of SIX3-containing Protein Complex

| Band   | Identified proteins | Peptides                                                                                                                                                                         |
|--------|---------------------|----------------------------------------------------------------------------------------------------------------------------------------------------------------------------------|
| 230kDa | Mi-2 $\alpha$ /CHD3 | KPTHCSECGKA<br>QDTEALLTADSAQTK<br>RTGCPPALLGK                                                                                                                                    |
| 220kDa | Mi-2 $\beta$ /CHD4  | DLSGYKGSSTPTK<br>SDALSKELQ<br>KGWPSGNLAR<br>QGTNSLGLK                                                                                                                            |
| 110kDa | LSD1/KDM1A          | GETSIAECLTYLDNGV<br>VLHAHQFLQNEYALS<br>KNISVASCNSSQVVAVGR                                                                                                                        |
| 83kDa  | TLE1                | KKHHDAEHHRDR<br>KEEFQFLQAQYHSLK<br>VPHAGMNGELTS<br>DPPPHMRVPTI<br>RAKQVTMAELNAII                                                                                                 |
| 83kDa  | TLE2                | KFSILEICDR<br>KEDRAGVEAEGSR<br>QPSEPPSPATTPCGK<br>KELILNDLPAS                                                                                                                    |
| 83kDa  | TLE3                | KSNTPTPRNDAPTPGTSTTPGLR<br>VSPAHSPPENGLDK<br>KGCVKIWDISQ<br>DKSSTPGLKSNTPTPR<br>VRQFQGHTDGAS                                                                                     |
| 75kDa  | HSP70               | KATAGDTHLGGEDFDNRL<br>RKFGDPVVQSDMK<br>RLVNHFVEEFKRKH<br>KNQVALNPQNTVFDKRL<br>KNALESYAFNMKS<br>RTTPSYVAFTDTERL<br>KAQIHDLVLVGGSTRI<br>KNQVALNPQNTVFDKR<br>RDAKLDKAQIHDLVLVGGSTRI |
| 70kDa  | MTA3                | KTLLADKGEIRV<br>RALDCSSSVRQPSLHMSAAAASRD<br>RVGDYVYFENSSSNPYLIRR                                                                                                                 |

|       |                       |                                                                                                                                                                           |
|-------|-----------------------|---------------------------------------------------------------------------------------------------------------------------------------------------------------------------|
|       |                       | KTLLADKGEIRV<br>RVGDYVYFENSSSNPYLIRR<br>KTLLADKGEIRV                                                                                                                      |
| 68kDa | p66 $\alpha$ /GATAD2A | KAAFVKALQQEQEIEQR<br>KLG PQASSQVVMPLVRG                                                                                                                                   |
| 66kDa | p66 $\beta$ /GATAD2B  | RVIAPNPAQLQGQRG<br>KTPVVQNAASIVQPSPAHVGQQGLSK                                                                                                                             |
| 60kDa | HDAC2                 | RSIRPDNMSEYSKQ<br>KLHISPSNMTNQNTPEYMEKI<br>KATAEEMTKYHSDEYIKF<br>RQQTDMAVNWAGGLHHAKK<br>KGKYYAVNFPMRD<br>RLGCFNLTVKG                                                      |
| 55kDa | HDAC1                 | RSIRPDNMSEYSKQ<br>KLHISPSNMTNQNTNEYLEKI<br>RLGCFNLTIKGHAKC<br>RKVCYYYDGDVGNYYYGQGHMPKPHRI<br>KLHISPSNMTNQNTNEYLEKI<br>KQQTDIAVNWAGGLHHAK<br>YYAVNYPLRD<br>RMTHNLLLNYGLYRK |
| 48kDa | RbAp48                | RRLNVWDLSKI<br>KTPSSDVLVFDYTKH<br>KTVALWDLRNLKL<br>KGEFGGFGSVSGKI<br>KTIFTGHTAVVEDVSWHLLHESLFGSVADDQKL                                                                    |
| 46kDa | RbAp46                | RYMPQNPHIATKT<br>KIECEIKINHEGEVNRA<br>KTPSSDVLVFDYTKHPAKPDPSGECNPDLRL<br>RVINEEYKIWKK<br>KIGEEQSAEDAEDGPPELLFIHGGHTAKI                                                    |
| 40kDa | SIX3                  | KHESILRARAVV<br>DLYHILENHK<br>RLQHQAI GPSGMR<br>QVASVCETLEETGDI<br>GRFLWSLPVAP<br>RADTGTSI<br>REWYLQDPYPNPSKK                                                             |
| 35kDa | MBD3                  | RQTASIFKQPVTKI                                                                                                                                                            |

KGKPDNTALPVRQ  
KNPGVWLNTTQPLCKA  
RYLGGSMDLSTFDFRT  
KKLSGLNAFDIAEELVKTMDLPKG

30kDa

MBD2

KSGLSAGKSDVYYFSPSGKK  
KRLQGLSASDVTEQIIKT

Supplementary Table S3: The Primers used in ChIP and qChIP Assays

| Gene    | Strand | Sequence               |
|---------|--------|------------------------|
| ANGPTL4 | F      | CCTCAGGCTCCCAAGTAG     |
| ANGPTL4 | R      | TGAAAGGGTTCGTCATCG     |
| CTCF    | F      | TGGTCCCTTCACAGCAAA     |
| CTCF    | R      | TTCAGGTAGGAGGCATCAG    |
| FOXC2   | F      | TCCCAGGATCATTGCTACTTAC |
| FOXC2   | R      | GGCGACTCCGTCTTCACT     |
| GLI1    | F      | TAGCCTGGGTCAAAGTCC     |
| GLI1    | R      | TGTGGAAGGTCAGTGGGT     |
| LAMB1   | F      | GTCCCGTCACCAACCTCT     |
| LAMB1   | R      | ACTCCGTTTCCCATCTCG     |
| MTF1    | F      | GCCAGCAAGTCTTCCAAA     |
| MTF1    | R      | GGTTCAGGTCAGTGCCATA    |
| NCOA3   | F      | AAGTCTCACCTATTGCTTTTGG |
| NCOA3   | R      | AATGGGTCAGGACTGTTGTTAT |
| WNT1    | F      | CAGCAACCCTTGTCTTCCC    |
| WNT1    | R      | TGGCATCCTATGGCGTGT     |
| WNT3    | F      | GGAGGCTGGAAGCTGGGA     |
| WNT3    | R      | CGAGGGTAGAAAGCACAGGGA  |
| WNT5A   | F      | TGCCAAACTTCGCAATCTC    |
| WNT5A   | R      | GGACCTCCTCATTCTTACCTCT |
| JAG1    | F      | CCCGCCAGTGCTCAAGAT     |
| JAG1    | R      | GGGAGGCTCAGTATGAACAATA |
| PAX4    | F      | CCAGATGGCACGCTTATT     |
| PAX4    | R      | ACTGTCCGCTGAGCAACA     |
| RBP1    | F      | CTGCCATTAGGTGAAACG     |
| RBP1    | R      | CTGGGCGACAGAGTGAGA     |
| WDR74   | F      | GGTGGTTACCATGACCCT     |
| WDR74   | R      | TTCCTCCTTGGACTGCTC     |
| ZEB2    | F      | CCCTTCCATATTTGCATAACC  |
| ZEB2    | R      | CTACACCTCGGGGAGACCTC   |
| GAPDH   | F      | GCCTCCAAACAGCCTTGC     |
| GAPDH   | R      | GCCCTGACTTCTCCACCT     |

Supplementary Table S4: The Primers used in quantitative real-time PCR (qPCR)

| Gene    | Strand | Sequence                 |
|---------|--------|--------------------------|
| SIX3    | F      | CCGTCTCCGTTCCGAATTTG     |
| SIX3    | R      | ACACATTTGCTATTTCCCTCTCC  |
| MTA3    | F      | CAAAGACTTCAATGACATACGG   |
| MTA3    | R      | ATTTGGTTTGCTGTAGGTTGG    |
| LSD1    | F      | AACCTCTATAAAGCTCCAATACTG |
| LSD1    | R      | AACCTCTATAAAGCTCCAATACTG |
| WNT1    | F      | CCAATCCCTCTCCACTCTTC     |
| WNT1    | R      | GCAAACGCATCTTTGAGAAAC    |
| FOXC2   | F      | TCCTACGACTGCACGAAATA     |
| FOXC2   | R      | CCTTAATTGTCTGGTTGGGT     |
| ANGPTL4 | F      | ACAAGCACCTAGACCATGAG     |
| ANGPTL4 | R      | CGCCTCTGAATTACTIONGTCCA  |
| GLI1    | F      | GGTGAGAAGCCATACATGTG     |
| GLI1    | R      | ACATACGGCTTCTCATTGGA     |
| NCOA3   | F      | TCCTGATCAGAAATACTGCT     |
| NCOA3   | R      | AAACACGTAGATATTGCCCT     |
| JAG1    | F      | GTTCTCCTAATAACTGTTCCCA   |
| JAG1    | R      | CCATTAACCAAATCCCGACAG    |
| ZEB2    | F      | CCAGTCCAGACCAGTATTCC     |
| ZEB2    | R      | CAAGCAATTCTCCCTGAAATCC   |
| GAPDH   | F      | TCCTCCTGTTTCATCCAAGC     |
| GAPDH   | R      | TAGTAGCCGGGCCCTACTTT     |

Supplementary Table S5: The shRNA Sequences

|          |                       |
|----------|-----------------------|
| shSCR    | TTCTCCGAACGTGTCACGT   |
| shSIX3#1 | ATCAACAAACACGAGTCGATC |
| shSIX3#2 | TTGCCAAACTTCGCCGATTCT |
| shMTA3   | GCTTTCTTCCTTCATACTACA |
| shLSD1-1 | GAGACAGACAAATACTTGA   |
| shWNT1   | GAATCCTGCACGTGTGACTAC |
